1 **Prevention of EloR/KhpA heterodimerization by introduction of site-specific amino acid**  
2 **substitutions renders the essential elongasome protein PBP2b redundant in *Streptococcus***  
3 ***pneumoniae*.**

4 Anja Ruud Winther, Morten Kjos, Gro Anita Stamsås, Leiv Sigve Håvarstein and Daniel  
5 Straume\*.

6 *The Norwegian University of Life Sciences, Faculty of Chemistry, Biotechnology and Food*  
7 *Science, Christian Magnus Falsens vei 1, 1430 Ås, Norway*

8

9 Keywords: *Streptococcus pneumoniae*, elongasome, EloR, KhpA, PBP2b.

10 \*Corresponding author: Daniel Straume

11 The Norwegian University of Life Sciences, Faculty of Chemistry, Biotechnology and Food  
12 Science, Christian Magnus Falsens vei 1, 1430 Ås, Norway

13 E-mail: [daniel.straume@nmbu.no](mailto:daniel.straume@nmbu.no)

14 Phone: +47 67 23 25 60

15

16

17 **Abstract.**

18 The RNA binding proteins EloR and KhpA are important components of the regulatory  
19 network that controls and coordinates cell elongation and division in *S. pneumoniae*. Loss of  
20 either protein reduce cell length, and makes the essential elongasome proteins PBP2b and  
21 RodA dispensable. It has been shown previously in formaldehyde crosslinking experiments  
22 that EloR co-precipitates with KhpA, indicating that they form a complex *in vivo*. In the present  
23 study, we used 3D modeling and site directed mutagenesis in combination with protein  
24 crosslinking to further study the relationship between EloR and KhpA. Protein-protein  
25 interaction studies demonstrated that KhpA forms homodimers and that KhpA in addition binds  
26 strongly to the KH-II domain of EloR. Site directed mutagenesis identified isoleucine 61 (I61)  
27 as crucial for KhpA homodimerization. When substituting I61 with phenylalanine, KhpA lost  
28 the ability to homodimerize, while it still interacted strongly with EloR. In contrast, both homo-  
29 and heterodimerization were lost when I61 was substituted with tyrosine. By expressing these  
30 KhpA versions in *S. pneumoniae*, we were able to show that disruption of EloR/KhpA  
31 heterodimerization makes the elongasome redundant in *S. pneumoniae*. Of note, loss of KhpA  
32 homodimerization did not give rise to this phenotype, demonstrating that the EloR/KhpA  
33 complex is crucial for regulating the activity of the elongasome. In support of this conclusion,  
34 we found that localization of KhpA to the pneumococcal mid-cell region depends on its  
35 interaction with EloR. Furthermore, we found that the EloR/KhpA complex co-localizes with  
36 FtsZ throughout the cell cycle.

37 **Importance.**

38 To ensure correct cell division, bacteria need to monitor the progression of cell division and  
39 coordinate the activities of cell division proteins accordingly. Understanding the molecular  
40 mechanisms behind these regulatory systems is of high academic interest and might facilitate

41 the development of new therapeutics and strategies to combat pathogens. EloR and KhpA form  
42 a heterodimer that is part of a signaling pathway controlling cell elongation in the human  
43 pathogen *S. pneumoniae*. Here we have identified amino acids that are crucial for EloR/KhpA  
44 heterodimerization, and demonstrated that disruption of the EloR/KhpA interaction renders the  
45 cells independent of a functional elongasome. Furthermore, we found the EloR/KhpA complex  
46 to co-localize with the division ring (FtsZ) during cell division.

47

48

## 49 **Introduction.**

50 In most bacteria, the cytoplasmic membrane is surrounded by a peptidoglycan layer, which  
51 gives the cell its shape and provides resistance to internal turgor pressure (1). The  
52 peptidoglycan sacculus also serves as an anchoring device for surface proteins and other cell  
53 wall components such as teichoic acids and extracellular polysaccharides (2-5). During cell  
54 division and growth, the peptidoglycan synthesis machineries add new material into the  
55 existing cell wall. In ovoid bacteria, such as the important human pathogen *Streptococcus*  
56 *pneumoniae*, two modes of cell wall synthesis occur. The divisome synthesizes the septal  
57 crosswall, while extension of the lateral cell body is carried out by the elongasome (6, 7). The  
58 cell wall synthesis machineries of *S. pneumoniae* contain six penicillin binding proteins  
59 (PBPs), five of which participate in building the cell wall via transglycosylase and  
60 transpeptidase reactions. The class A PBPs, PBP1a, PBP2a, PBP1b, perform both reactions,  
61 while the class B PBPs, PBP2b and PBP2x, only have transpeptidase activity. Recently, it was  
62 discovered that the monofunctional class B enzymes PBP2x and PBP2b operate in conjunction  
63 with FtsW and RodA, two newly discovered transglycosylases belonging to the SEDS family  
64 proteins (shape, elongation, division and sporulation) (8, 9). The sixth PBP, PBP3, is a D,D-  
65 carboxypeptidase that reduces the level of inter peptide cross-bridges in the peptidoglycan by  
66 cleaving off the C-terminal D-Ala residue in stem pentapeptides (10). PBP2b and RodA have  
67 been found to be essential for cell elongation, while PBP2x and FtsW are essential for synthesis  
68 of the septal disc. Functional studies and subcellular localizations suggest that PBP2b/RodA  
69 and PBP2x/FtsW are key components of the elongasome and the divisome, respectively (11-  
70 14). It is not clear whether the elongasome- and divisome activities alternate or if these  
71 machineries work simultaneously during cell division. However, some data suggest a short  
72 period of cell elongation before the onset of septal peptidoglycan synthesis (12, 15).

73 In contrast to rod-shaped bacteria, *S. pneumoniae* lacks MreB, a cytoskeleton-like  
74 protein that moves the cell wall synthesis machinery in helical patterns perpendicular to the  
75 cell length (16). Instead, pneumococci elongate by inserting new peptidoglycan into the  
76 existing cell wall between the future cell equator and the septum in a circumferentially motion  
77 guided by the FtsZ/FtsA division ring (6, 17, 18). At some point during cell elongation, the  
78 divisome initiates septal cross wall synthesis. If the coordinated activities of the elongasome  
79 and the divisome get out of control, it leads to severe growth defects and development of  
80 morphological abnormalities (11, 13, 19). The cells have therefore developed sophisticated  
81 systems to monitor cell cycle progression in order to fine-tune the activity of the elongasome  
82 and divisome during cell division. One of these systems includes the membrane-spanning  
83 eukaryotic-like serine/threonine kinase StkP. It has four extracellular cell-wall-binding PASTA  
84 domains, which are believed to monitor the status of the cell wall during division and activate  
85 the appropriate cell division proteins through phosphorylation (20-23).

86 In a recent study we found that EloR, which is phosphorylated by StkP on threonine 89  
87 (24, 25), is a key regulator of cell elongation in *S. pneumoniae* (26). Our results indicated that  
88 EloR stimulates cell elongation when phosphorylated, while being inactive or preventing  
89 elongation in its non-phosphorylated form. Moreover, we found that  $\Delta eloR$  cells can survive  
90 without PBP2b and its cognate SEDS transglycosylase RodA, demonstrating that deletion of  
91 *eloR* suppresses the need for a functional elongasome in *S. pneumoniae*. Cells lacking EloR  
92 displayed a significant reduction in growth rate and became short and round (25, 26). EloR is  
93 a cytoplasmic protein of 37 kDa comprising three different domains: an N-terminal jag-domain  
94 of unknown function followed by two RNA-binding domains, a type II KH domain (KH-II)  
95 and R3H, at the C-terminal end (27, 28). In a recent study Zheng et al. (29) showed that EloR  
96 co-precipitates with a protein called KhpA after treating cells with formaldehyde cross linker.  
97 KhpA is a small (8.9 kDa) RNA-binding protein that consists only of a type II KH domain.

98 Similar to EloR, deletion of the *khpA* gene suppresses the need for a fully functional elongasome,  
99 as *pbp2b* as well as *rodA* can be deleted in a  $\Delta khpA$  mutant (29). EloR and KhpA probably  
100 bind certain target RNAs to modulate expression of specific cell division and/or elongation  
101 proteins during different stages of the cell cycle. In support of this hypothesis Zheng et al. (29)  
102 reported that the absence of EloR or KhpA results in higher cellular levels of the cell division  
103 protein FtsA, and that this increase compensates for the loss of PBP2b (29). Homologs of EloR  
104 and KhpA appear to be widespread in many Gram-positive bacteria, and are found in genera  
105 such as *Streptococcus*, *Bacillus*, *Clostridium*, *Listeria*, *Enterococcus*, *Lactobacillus* and  
106 *Lactococcus*. The conservation of these proteins across large phylogenetic distances indicates  
107 that they are central players in the cell elongation and division machineries of low G+C Gram-  
108 positive bacteria.

109 In the present study, we show that KhpA homodimerizes, and that it in addition interacts  
110 strongly with the KH-II domain of EloR forming an EloR/KhpA heterodimer. Furthermore, we  
111 identified amino acids critical for these interactions. We successfully constructed a single  
112 amino acid mutant of KhpA that fails to homodimerize but still interacts with EloR, and a single  
113 amino acid mutant that neither self-interacts nor heterodimerizes. The unique properties of  
114 these KhpA versions were used to demonstrate that the function of EloR is compromised when  
115 it is no longer able to interact with KhpA, resulting in cells phenocopying  $\Delta eloR$  and  $\Delta khpA$   
116 mutants (reduced cell elongation). Finally, *in vivo* localization studies showed that KhpA co-  
117 localizes with FtsZ throughout the cell cycle, and that this localization pattern depends on its  
118 interaction with EloR.

119

120

121

## 122 Results

### 123 **KhpaA interacts with itself and the KH-II-domain of EloR.**

124 In a recent study we showed that the loss of EloR suppresses the need of a functional  
125 elongasome in *S. pneumoniae* since *pbp2b* and *rodA* could be deleted (26). Soon after this,  
126 Zheng and co-workers published that EloR co-precipitated with a small protein (8.9 kDa) called  
127 KhpaA in formaldehyde crosslinking experiments. In addition, they found that a  $\Delta khpaA$  mutant  
128 phenocopies a  $\Delta eloR$  mutant and that both proteins bound to a similar set of RNA molecules  
129 in pulldown experiments (29). In the present work, we utilized a bacterial two-hybrid system  
130 (BACTH assay) to further study the interaction between EloR and KhpaA. The BACTH system  
131 is based on interaction-mediated reconstitution of the *Bordetella pertussis* adenylate cyclase  
132 CyaA, which consists of two domains (T18 or T25). When brought together through interaction  
133 of the proteins tested, the active T18-T25 reconstitution produces cAMP, which ultimately  
134 results in measurable  $\beta$ -galactosidase production in the *E. coli* host (30). When testing full-  
135 length EloR against KhpaA in the BACTH assay, we observed a strong positive interaction (Fig.  
136 1), confirming the crosslinking results of Zheng and co-workers (29). Next, we wanted to  
137 identify the part of EloR that interacts with KhpaA. To do so, each of the three domains of EloR  
138 (Jag, KH-II and R3H) was tested individually against KhpaA (Fig. 1). The results clearly showed  
139 that KhpaA specifically interacts with the KH-II-domain of EloR (KH-II<sup>EloR</sup>).

140 Since KH-domains recognize on average up to four nucleotides, they have a tendency  
141 to interact with each other to bind longer sequences and thereby increase their target specificity  
142 (28, 31). We therefore suspected that KhpaA self-interacts and forms homodimers. BACTH  
143 assays using KhpaA fused to T18 and T25 resulted in a strong positive signal (Fig. 1), suggesting  
144 that KhpaA, in addition to interacting with EloR, also forms homodimers.

145

146 **Identification of amino acid residues crucial for KhpA homo- and EloR/KhpA**  
147 **heterodimerization.**

148 We reasoned that a 3D model of KhpA might help us identify amino acids that are crucial for  
149 homodimerization and heterodimerization with EloR. KH-domains have a highly conserved  
150 fold and many 3D-structures are available in the databases (28, 31). To predict the 3D structure  
151 of KhpA, we used the online structure prediction tool iTasser. As expected, the predicted  
152 structure shows a typical KH-II domain (C-score = -0.36) consisting of three  $\alpha$ -helices packed  
153 against a three-stranded  $\beta$ -sheet ( $\alpha$ - $\beta$ - $\beta$ - $\alpha$ - $\alpha$ - $\beta$ ) (Fig. 2A). The conserved RNA binding cleft is  
154 made up of the third  $\alpha$ -helix and the third  $\beta$ -strand. The typical GxxG loop that interacts with  
155 the phosphate backbone of the ssRNA (or in some cases ssDNA) is located between the  $\alpha$ 2-  
156 and  $\alpha$ 3-helices (marked in green in Fig. 2A). Introduction of two aspartates in this loop  
157 (GDDG) abolishes binding of target RNA (32). To predict the interaction surface between two  
158 KhpA molecules, we did protein docking using ZDOCK with the 3D-model of KhpA as input.  
159 According to the model (ZDOCK score = 895.421), the  $\alpha$ 3-helix creates an anti-parallel  
160 interaction surface between two KhpA proteins, resulting in a homodimeric structure where the  
161 GxxG loops of the two proteins point in opposite directions (Fig. 2B). Based on this structure,  
162 we made four different mutant versions of KhpA in which single amino acids predicted to  
163 protrude from the  $\alpha$ 3-helix was altered (R53K, R59K, T60Q and I61F). The point mutated  
164 versions of KhpA were then tested for their ability to homodimerize by performing BACTH  
165 assays. The changes in position 53, 59 or 60 did not dramatically reduce homodimerization,  
166 but changing I61 to the bulkier phenylalanine abolished the interaction between KhpA  
167 monomers (Fig. 2C). To get more accurate data on the effect of the I61F mutation, quantitative  
168 measurements of the  $\beta$ -galactosidase production were performed (see Materials and Methods).  
169 Indeed, the KhpA<sup>I61F</sup> mutant protein has completely lost the ability to self-interact, but can still



170 form heterodimers with EloR (Fig. 3A). In an attempt to create a KhpA mutant that does not  
171 form homodimers nor EloR/KhpA heterodimers, I61 was changed to tyrosine, which adds a  
172 polar hydroxyl group to the bulky phenyl ring. When tested in quantitative BACTH assays, our  
173 results showed that the KhpA<sup>I61Y</sup> mutant has lost the ability to interact with itself and the  
174 interaction with EloR was dramatically reduced (Fig. 3A).

175 Amino acid sequence alignment of the KH-II<sup>EloR</sup> and KhpA, suggests that leucine 239  
176 (L239) in EloR corresponds to I61 in KhpA (see supplemental Fig. S1). Accordingly, when  
177 L239 in EloR was substituted with a tyrosine, KhpA could no longer interact with EloR,  
178 showing that this residue is indeed important for EloR/KhpA heterodimerization (Fig. 3A). To  
179 prove that L239 and I61 are in close proximity in the EloR/KhpA heterodimer, we replaced  
180 these two amino acids with cysteins to determine whether this would result in a disulfide bridge  
181 between the two proteins *in vivo*. A pneumococcal strain expressing the mutant proteins  
182 EloR<sup>L239C</sup> and KhpA<sup>I61C</sup> was therefore constructed (strain AW336). EloR<sup>L239C</sup> contained an N-  
183 terminal 3xflag-tag to allow detection with  $\alpha$ -flag antibodies. Strain AW336 was grown to  
184 exponential phase, harvested, and lysed using SDS loading buffer with or without the reducing  
185 agent  $\beta$ -mercaptoethanol (see Material and Methods). Next, samples were analyzed by SDS-  
186 PAGE followed by immunoblotting. In non-reduced cell lysates, we detected a shift in band  
187 size corresponding to the complex between EloR and KhpA (Fig. 3B). This shift was not  
188 present in samples where  $\beta$ -mercaptoethanol had been added to break the disulfide bond, or in  
189 any of the samples containing wild type 3xflag-EloR or 3xflag-EloR<sup>L239C</sup> only. This confirms  
190 the interaction between KhpA and the KH-II domain of EloR *in vivo*, and that I61 in the  $\alpha$ 3-  
191 helix of KhpA interacts directly with L239 in the  $\alpha$ 3-helix of the KH-II<sup>EloR</sup> domain.

192

193

194 **Prevention of EloR/KhpA heterodimerization relieves the requirement of *pbp2b*.**

195 A  $\Delta khpA$  mutant phenocopies a  $\Delta eloR$  mutant (29). Both mutants have reduced growth rates,  
196 form shorter cells and are viable without a functional elongasome (i.e. without a *pbp2b* or *rodA*  
197 gene) (26, 29). We hypothesized that the reason  $\Delta khpA$  cells phenocopies  $\Delta eloR$  cells is  
198 because deletion of either will prevent the formation of the EloR/KhpA complex. In other  
199 words, the elongasome only becomes essential when the EloR/KhpA complex is able to form  
200 and carry out its normal biological function. To test this hypothesis we exploited the unique  
201 properties of KhpA<sup>I61F</sup> and KhpA<sup>I61Y</sup>. KhpA<sup>I61F</sup> does not form homodimers, but form  
202 heterodimers with EloR, while KhpA<sup>I61Y</sup> is unable to form either. First, we examined if  
203 expression of KhpA<sup>I61F</sup> or KhpA<sup>I61Y</sup> generated cells with reduced growth rate similar to a  
204  $\Delta khpA$  mutant. Deletion of *khpA* (strain DS420) increased the doubling time with  
205 approximately 15 minutes, which complies with previous findings (15-30 minutes) (29), while  
206 strains expressing KhpA<sup>I61F</sup> or KhpA<sup>I61Y</sup> (AW212 and AW275) had growth rates similar to the  
207 wild type strain (data not shown). Microscopic examination of KhpA<sup>I61F</sup> or KhpA<sup>I61Y</sup> cells  
208 showed that the KhpA<sup>I61Y</sup> strain grew in short chains similar to KhpA deficient cells. The  
209 KhpA<sup>I61F</sup> strain on the other hand grew mainly as diplococci similar to the wild type strain (Fig.  
210 4A). By measuring cell lengths and widths, it became evident that KhpA<sup>I61Y</sup> cells, in which  
211 KhpA is unable to form a complex with EloR, have a rounder cell morphology with reduced  
212 cell elongation similar to  $\Delta khpA$  cells (Fig. 4B). This phenotype is also characteristic for  $\Delta eloR$   
213 cells (25, 26, 29). In contrast, cells expressing the monomeric version of KhpA (I61F) that can  
214 still form a complex with EloR, displayed a normal length/width distribution (Fig. 4B).

215 To further test our hypothesis that EloR/KhpA heterodimerization is required for  
216 normal elongasome function, we compared pneumococcal mutants expressing KhpA<sup>I61F</sup>,  
217 KhpA<sup>I61Y</sup> and EloR<sup>L239Y</sup> (AW279) with respect to the essentiality of their *pbp2b* gene. Indeed,

218 *pbp2b* could be deleted in KhpA<sup>I61Y</sup> and EloR<sup>L239Y</sup> cells with normal transformation  
219 frequencies, but not in KhpA<sup>I61F</sup> cells. Since it has been shown that mutants expressing a KhpA  
220 unable to bind ssRNA (changing the ssRNA-binding motif GxxG to GDDG) have a  
221  $\Delta khpA/\Delta eloR$  phenotype (29), we wondered whether this was because KhpA<sup>GDDG</sup> had reduced  
222 interaction with EloR. However, our BACTH assay showed that KhpA<sup>GDDG</sup> successfully  
223 formed a complex with EloR (Fig. 4C), and we confirmed that *pbp2b* could be deleted in  
224 pneumococci expressing KhpA<sup>GDDG</sup>, as also reported by Zheng et al (29). This demonstrates  
225 that EloR interacts with KhpA because it fully depends on the ssRNA binding capacity of  
226 KhpA to form a functional EloR/KhpA complex.

227

#### 228 **EloR recruits KhpA to the division site.**

229 KhpA and EloR have been shown to co-localize to the septal region of dividing cells (26, 29).  
230 Since they form heterodimers *in vivo*, we wondered if KhpA is recruited to mid-cell through  
231 its interaction with EloR. To explore this, the subcellular localization of sfGFP-fused KhpA  
232 was determined in wild type cells and in a  $\Delta eloR$  mutant (Fig. 5). Mid-cell localization of  
233 KhpA-sfGFP was found in 75.4% of wild type cells, confirming previous findings (29). In  
234 contrast, KhpA-sfGFP was found at mid-cell in only 0.5% of the  $\Delta eloR$  mutant cells. To show  
235 that it is the direct interaction between KhpA and EloR that localize KhpA to the division site  
236 and not some indirect effect of deleting the *eloR* gene, we fused sfGFP to the I61F and I61Y  
237 mutant versions of KhpA. As expected, KhpA<sup>I61Y</sup>-sfGFP, which does not bind EloR, lost its  
238 localization to mid-cell (found at mid-cell in only 2% of the cells). The monomeric KhpA<sup>I61F</sup>-  
239 sfGFP are still able to interact with EloR and displayed significantly higher degree of mid-cell  
240 localization (found at mid-cell in 19% of the cells). In accordance with these results expression  
241 of EloR<sup>L239Y</sup>, which cannot interact with KhpA, resulted in mislocalization of KhpA-sfGFP

242 (Fig. 5). Together, these results strongly indicate that KhpA is recruited to mid-cell through  
243 complex formation with EloR.

244 To determine whether the EloR/KhpA complex is recruited to the division zone during  
245 early, late or all stages of cell division, we compared the localization patterns of KhpA and  
246 FtsZ. FtsZ forms the division ring, which functions as a scaffold for a number of proteins found  
247 in the elongasome and divisome. FtsZ is therefore present at the division zone during initiation  
248 of new septa, cell elongation and cross wall synthesis, but it is not required for the final stage  
249 of daughter cell separation (12, 17). KhpA-sfGFP and FtsZ fused to the fluorescent marker  
250 mKate2 were co-expressed in *S. pneumoniae* (strain AW198), and fluorescence microscopy  
251 images demonstrate that mid-cell located KhpA-sfGFP follows the same localization pattern  
252 as FtsZ (Fig. 6). This shows that the EloR/KhpA complex is recruited to the division zone at  
253 the very early stage, and that it remains co-localized with the cell division machineries  
254 throughout the cell cycle. Note, however, that KhpA does not exclusively co-localized with  
255 FtsZ as it is also found throughout the cytoplasm.

256

## 257 **Discussion.**

258 It has been shown previously that  $\Delta khpA$  and  $\Delta eloR$  mutant strains are similar in several  
259 respects. They both exhibit less elongated cell morphologies, and are able to survive without  
260 PBP2b and other essential components of the elongasome (26, 29). The fact that  $\Delta khpA$  and  
261  $\Delta eloR$  mutants have similar phenotypes could suggest that KhpA and EloR are acting at  
262 different steps in the same regulatory pathway. However, the finding that KhpA co-precipitates  
263 with EloR after formaldehyde crosslinking (29) suggests an alternative model, namely that they  
264 function as a single unit and that disruption of this complex gives rise to the phenotypes  
265 described above. The results presented in the present work prove that the latter model is correct.

266 Disruption of the EloR/KhpA complex by introduction of site-specific amino acid  
267 substitutions, gives rise to shorter cells and renders the elongasome redundant. It is therefore  
268 likely that its role is to stimulate or control elongasome-mediated lateral cell wall synthesis. To  
269 do this, our results show that KhpA must be able to bind its target nucleic acid, which is most  
270 likely ssRNA. The typical binding surface of KH-domains can only accommodate four  
271 unpaired bases (28, 31), and consequently has low binding specificity. It is reasonable to  
272 assume that the RNA sequence motifs recognised by KhpA and the KH-II domain of EloR are  
273 different. Hence, by combining the two domains in a heterodimer the binding specificity and  
274 affinity for its target ssRNA(s) are substantially increased. The target RNA(s) bound by the  
275 EloR/KhpA complex might be ribosomal RNA, small noncoding RNA or mRNA.  
276 Identification of this RNA will be an important goal for future research seeking to understand  
277 the function of the EloR/KhpA system.

278 Our results show that KhpA also forms homodimers, which might have their own  
279 distinct biological function. The observed homomeric and heteromeric interactions of KhpA  
280 seem to be equally strong (see Fig. 3A), and it is therefore likely that both complexes forms *in*  
281 *vivo*. However, our preliminary studies did not detect any obvious functional deficits or major  
282 phenotypic changes associated with the KhpA<sup>I61F</sup> mutation, i.e. the mutation disrupting the  
283 formation of KhpA homodimers without preventing the formation of EloR/KhpA  
284 heterodimers. As the KhpA monomers are arranged in an antiparallel orientation in the dimer,  
285 they will be able bind two successive sequence motifs on the same RNA strand. The binding  
286 of two motifs will increase the target sequence specificity considerably, and will make the RNA  
287 sequence motif recognized by the homodimer different from that recognized by the EloR/KhpA  
288 heterodimer. Considering this, and that the KhpA<sup>I61F</sup> and KhpA<sup>I61Y</sup> mutations give rise to  
289 completely different phenotypes, it is likely that the KhpA homodimers and EloR/KhpA  
290 heterodimers serve different biological functions.

291           The EloR/KhpA heterodimer contains three RNA-binding domains, i.e two domains  
292 from EloR (KH-II and R3H) and one from KhpA. The presence of several RNA-binding  
293 domains is a common feature of proteins containing KH-domains. As mentioned above, this  
294 increases target specificity and is also believed to have an important role in the folding of  
295 ssRNA sequences (31). Based on the present and previous studies (25, 26, 29), we know that  
296 the EloR/KhpA complex requires the combined action of all three RNA-binding domains to  
297 regulate cell elongation. However, it is not known whether all three domains bind to the same  
298 RNA strand, or if the KH-II<sup>EloR</sup>/KhpA complex binds one strand while the R3H domain binds  
299 another. The crystal structure of an EloR homolog from *Clostridium symbosium* (PDB 3GKU)  
300 suggests a dimeric structure (33), which in principle could bind two KhpA molecules resulting  
301 in a complex with a total of six RNA-binding domains. To test this possibility we used the  
302 BACTH system to determine if EloR from *S. pneumoniae* forms homodimers. The results were  
303 inconclusive as we obtained just a very weak positive signal (data not shown). Hence, we  
304 cannot conclude whether the biologically active complex between EloR and KhpA is dimeric  
305 (EloR/KhpA) or tetrameric (KhpA/EloR/EloR/KhpA).

306           Synthesis of the lateral cell wall takes place in an area close to the division septum,  
307 possibly where the division septum meets the periphery of the cell. Previous studies show that  
308 EloR and KhpA localize to the septal region (26, 29). Here, we show that KhpA homodimers  
309 are found throughout the cytoplasm (strain AW353) (Fig. 5), while KhpA/EloR heterodimers  
310 localize together with FtsZ to the division site (AW198) (Fig. 6). This finding support the  
311 notion that these homo- and heterodimers serve different functions. Since KhpA co-localizes  
312 with the FtsZ-ring throughout the cell cycle, it suggests that a functional EloR/KhpA complex  
313 is important during the stages of cell division, which involves active peptidoglycan synthesis,  
314 but not during the final stage of daughter cell separation. Of note, FtsZ has been reported to  
315 disappear from the septum prior to the essential divisome protein PBP2x (12). Since the

316 EloR/KhpA complex closely follows the FtsZ localization pattern, it is compatible with the  
317 idea that the EloR/KhpA complex is involved in controlling the activity of the elongasome  
318 rather than controlling the divisome and septal cross-wall synthesis.

319 Zheng and co-workers report that the levels of FtsA, which together with FtsZ  
320 assembles into the division ring (6, 17, 34, 35), were elevated two- to threefold in  $\Delta eloR$  and  
321  $\Delta khpA$  mutants. Their results suggest that EloR and KhpA bind 5' untranslated regions of  
322 mRNAs, including the *ftsA* transcript, resulting in altered translation rates (29). In support of  
323 this hypothesis they found that *pbp2b* could be deleted in wild type cells overexpressing FtsA,  
324 although overexpression of FtsA could not fully restore the wild type phenotype of  
325  $\Delta eloR/\Delta khpA$  cells (29). We attempted to reproduce the described effect of elevated FtsA levels  
326 in our D39 and R6 strains. However, despite using the exact same expression conditions, i.e.  
327 overexpression of *ftsA* and its 24 nt upstream region from a  $P_{Zn}$  zinc-inducible promoter, we  
328 were not successful. Nevertheless, translational control of specific mRNAs seems to be the  
329 most probable mode of action for the EloR/KhpA complex.

330 Interestingly, the *eloR* gene is co-transcribed with a gene called *yidC* in *S. pneumoniae*  
331 (36) and most likely in several other bacteria including *S. thermophilus*, *L. monocytogenes*, *B.*  
332 *subtilis*, *L. lactis*, *E. faecium* and *L. plantarum*. Such conserved co-transcription could indicate  
333 a functional relationship between the genes. YidC is an insertase that assists in co-translational  
334 insertion of membrane proteins into the lipid bilayer. It functions together with the SecYEG  
335 translocon, the signal recognition particle (SRP) and the SRP-receptor FtsY. During co-  
336 translational protein targeting to the SecYEG translocon, the SRP-ribosome-nascent protein  
337 chain complex is first targeted to FtsY, which delivers the chain to the SecYEG translocon  
338 channel. The function of YidC is to facilitate the release of the transmembrane domains of  
339 inner membrane proteins from the channel into the lipid bilayer (37, 38). Having this in mind,  
340 it is tempting to speculate that the EloR/KhpA complex could be involved in regulating the

341 expression and insertion of specific membrane proteins involved in cell elongation through  
342 translational control.

343

## 344 **Materials and Methods.**

### 345 **Bacterial strains, cultivation and transformation**

346 All strains used in this work are listed in Table 1. *E. coli* strains were grown in LB broth at  
347 37°C with shaking (200 rpm), or on LB plates at 37°C unless otherwise indicated. When  
348 necessary the following antibiotics were used: kanamycin (50 µg/ml) and ampicillin (100  
349 µg/ml). Transformation experiments were performed with chemically competent cells using  
350 the heat shock method at 42°C for 45 seconds. *S. pneumoniae* were grown in C medium (39)  
351 or on Todd Hewitt-agar plates at 37°C. Agar plates were incubated in anaerobic chambers using  
352 AnaeroGen™ bags from Oxoid. When necessary, kanamycin (400 µg/ml) and streptomycin  
353 (200 µg/ml) were employed for selection of transformants. In order to knock out genes or  
354 introduce mutations, natural genetic transformation was employed. For transformation  
355 experiments, the culture was grown to an OD<sub>550</sub> of 0.05-0.1 and mixed with the transforming  
356 DNA (100-200 ng) and CSP1, which was added to a final concentration of 250 ng/ml. After 2  
357 hours of incubation at 37°C, 30 µl of the culture was plated on TH-agar containing the  
358 appropriate antibiotic followed by incubation at 37°C over night. To investigate growth rates  
359 of different mutants, cultures were grown to an OD<sub>550</sub> of 0.2, diluted to OD<sub>550</sub> = 0.05, and  
360 grown in 96-well Corning NBS clear-bottom plates in a Synergy H1 Hybrid Reader (BioTek).  
361 The OD<sub>550</sub> was measured automatically every 5 minutes for 20 hours.

362

363



## 364 **Construction of genetic mutants, gene fusions and point mutations**

365 DNA amplicons used in transformation experiments were created with overlap extension PCR  
366 as previously described (40). Genes were knocked out using a Janus cassette (41). The cassettes  
367 were created with sequences of ~1000 bp homologous to the flanking sequences of the insertion  
368 site in the genome. The same technique was employed when introducing point mutations or  
369 fusion genes. Primers used to create these amplicons are listed in Table S1. The *ftsZ*-mKate2  
370 fusion gene together with a kanamycin resistance cassette was amplified from genomic DNA  
371 of strain RR66 (42). All constructs were verified with PCR and Sanger Sequencing.

## 372 **SDS-PAGE and immunoblotting**

373 The strain RH425, SPH448, AW334 and AW336 were grown to an OD<sub>550</sub> of 0.3 in a culture  
374 volume of 45 ml. The cells were harvested at 4000 x *g*, and resuspended in 200  $\mu$ l 1 x SDS  
375 sample buffer not containing any reducing agents. The samples were then split in two, and  $\beta$ -  
376 mercaptoethanol was added to one parallel half of the samples to a final concentration of 100  
377 mM. All the samples (including the non-reduced) were heated at 100 °C for 10 minutes. The  
378 cell lysates were separated on a 15 % polyacrylamide gel with buffer conditions as previously  
379 described (43). For immunodetection purposes, the separated proteins were electroblotted onto  
380 a PVDF membrane (BioRad), and flag-EloR was detected with  $\alpha$ -flag antibodies as previously  
381 described (44).

## 382 **BACTH-assay**

383 The bacterial adenylate cyclase two hybrid (BACTH) assay, is based on the functional  
384 complementation of T18 and T25, two domains of the *B. pertussis* adenylate cyclase (CyaA)  
385 (30). When these domains are brought in close proximity to each other, they can actively  
386 produce cAMP. The production of cAMP leads to activation of the catabolite activator protein  
387 CAP, which in a complex with cAMP activates expression of a reporter gene placed behind the

388 cAMP/CAP promoter. The reporter gene used in this system encodes the  $\beta$ -galactosidase  
389 enzyme. In order to investigate the interaction between two proteins, we cloned genes encoding  
390 the proteins of interest in frame with either the T25 -or the T18-encoding sequences in plasmids  
391 provided by the manufacturer (Euromedex). The plasmids used in this study are listed in Table  
392 S2. Next, two plasmids, each expressing one protein fused to either T18 or T25 were  
393 transformed into *E. coli* BTH101 cells (a *cya*<sup>-</sup> strain). After overnight incubation on LB plates  
394 containing kanamycin (50  $\mu$ g/ml) and ampicillin (100  $\mu$ g/ml), five colonies from each  
395 transformation were grown in LB containing the appropriate antibiotics. When reaching an  
396 OD<sub>600</sub> of 0.2, three  $\mu$ l of the cell cultures were spotted onto LB plates containing 0.5 mM IPTG  
397 (to induce expression of the fusion genes), X-gal (40  $\mu$ g/ml), kanamycin (50  $\mu$ g/ml) and  
398 ampicillin (100  $\mu$ g/ml). After an overnight incubation at 30°C, results were interpreted as  
399 positive or negative based on the color of the spot. A positive interaction between the proteins  
400 of interest will result in blue spots on a plate. In addition, the production of  $\beta$ -galactosidase  
401 reporter was measured quantitatively by performing  $\beta$ -galactosidase assays using ortho-  
402 nitrophenyl- $\beta$ -galactoside (ONPG) as substrate. *E. coli* BTH101 containing plasmids with T18  
403 and T25-fused genes were grown in the presence of kanamycin (50  $\mu$ g/ml) and ampicillin (100  
404  $\mu$ g/ml) to OD<sub>600</sub> = 0.4-0.5. Then the cells were diluted to OD<sub>600</sub> = 0.05 in similar medium also  
405 containing 0.5 mM IPTG. The cells were incubated at 30 °C with shaking for 4 hours. Cells  
406 from one ml culture were lysed using 0.5 g of  $\leq$ 106  $\mu$ m glass beads (Sigma) and bead beating  
407 at 6.5 m/s for 3x20 seconds. Then the  $\beta$ -galactosidase activity in 100  $\mu$ l cell lysate was  
408 determined following the protocol of Steinmoen *et al.* (45).

#### 409 **Microscopy and cell shape distribution analyses**

410 The subcellular localization of different point mutated versions of the KhpA proteins was  
411 examined by fluorescence microscopy. The mutated proteins in question were fused to sfGFP  
412 (42) via a short glycine-linker (GGGGG). sfGFP fusions were expressed in the native *khpA*

413 locus in the *S. pneumoniae* genome (strains AW5, AW198, AW238, AW267, AW321 and  
414 AW353).

415 The cell morphology and cell shape distributions were examined by phase contrast  
416 microscopy. Microscopy experiments were performed by growing the strains to an OD<sub>550</sub> of  
417 0.1 before immobilizing the cells on a microscopy slide using 1.2 % low melting agarose  
418 (Biorad) in PBS. Phase contrast images and GFP fluorescence images were obtained using a  
419 Zeiss AxioObserver with ZEN Blue software, and an ORCA-Flash 4.0 V2 Digital CMOS  
420 camera (Hamamatsu Photonics) using a 1003 phase-contrast objective. The ImageJ plugin  
421 MicrobeJ (46) was used to analyze the cell shape and the subcellular localization of KhpA-  
422 sfGFP and FtsZ-mKate2. Cells were segmented using the phase contrast images. Cell shape  
423 distributions were made by calculating length/width for the individual cell and the significance  
424 of the differences between distributions were determined using a two-sample t-test. To  
425 determine the percentage of cells with mid-cell localized KhpA-sfGFP, the GFP fluorescence  
426 profiles were plotted for the individual cells. KhpA-sfGFP was scored as mid-cell localized  
427 when a fluorescence maximum peak was found in the mid-cell area (between 40-60 % of the  
428 cell length), and the percentage of cells with mid-cell localized KhpA-sfGFP was calculated.  
429 To analyze the subcellular localization of FtsZ-mKate2 and KhpA-sfGFP, the Maxima-option  
430 in MicrobeJ was used.

### 431 **3D-modelling**

432 The online structure determination tool iTasser was used to predict the 3D-structure of KhpA.  
433 It uses algorithms to predict protein 3D structure based on the amino acid sequence and known,  
434 published structures (47). The ZDOCK server was used to predict the interaction surface in a  
435 KhpA homodimer (48). Based on the predicted interaction surface in a KhpA homodimer, we

436 created point mutated versions of KhpA, introduced these into the BACTH system, and tested  
437 interactions between mutated KhpA proteins and between mutated KhpA and wild type EloR.

438

### 439 **Acknowledgements.**

440 This work was partly funded by a grant given by the Research Council of Norway. The authors  
441 have no conflict of interest with regard to the data presented in this study.

442

443

### 444 **References.**

- 445 1. Vollmer W, Blanot D, & de Pedro MA (2008) Peptidoglycan structure and architecture. *FEMS*  
446 *Microbiol Rev* 32(2):149-167.
- 447 2. Dramsi S, Magnet S, Davison S, & Arthur M (2008) Covalent attachment of proteins to  
448 peptidoglycan. *FEMS Microbiol Rev* 32(2):307-320.
- 449 3. Brown S, Santa Maria JP, Jr., & Walker S (2013) Wall teichoic acids of Gram-positive bacteria.  
450 *Annu Rev Microbiol* 67:313-336.
- 451 4. Bazaka K, Crawford RJ, Nazarenko EL, & Ivanova EP (2011) Bacterial extracellular  
452 polysaccharides. *Adv Exp Med Biol* 715:213-226.
- 453 5. Sørensen UB, Henrichsen J, Chen HC, & Szu SC (1990) Covalent linkage between the capsular  
454 polysaccharide and the cell wall peptidoglycan of *Streptococcus pneumoniae* revealed by  
455 immunochemical methods. *Microb Pathog* 8(5):325-334.
- 456 6. Pinho MG, Kjos M, & Veening JW (2013) How to get (a)round: mechanisms controlling  
457 growth and division of coccoid bacteria. *Nature reviews. Microbiology* 11(9):601-614.
- 458 7. Zapun A, Vernet T, & Pinho MG (2008) The different shapes of cocci. *FEMS Microbiol Rev*  
459 32(2):345-360.

- 460 8. Cho H, *et al.* (2016) Bacterial cell wall biogenesis is mediated by SEDS and PBP polymerase  
461 families functioning semi-autonomously. *Nat Microbiol*:16172.
- 462 9. Emami K, *et al.* (2017) RodA as the missing glycosyltransferase in *Bacillus subtilis* and  
463 antibiotic discovery for the peptidoglycan polymerase pathway. *Nat Microbiol* 2:16253.
- 464 10. Sauvage E, Kerff F, Terrak M, Ayala JA, & Charlier P (2008) The penicillin-binding proteins:  
465 structure and role in peptidoglycan biosynthesis. *FEMS Microbiol Rev* 32(2):234-258.
- 466 11. Berg KH, Stamsås GA, Straume D, & Håvarstein LS (2013) Effects of low PBP2b levels on  
467 cell morphology and peptidoglycan composition in *Streptococcus pneumoniae* R6. *J Bacteriol*  
468 195(19):4342-4354.
- 469 12. Tsui HC, *et al.* (2014) Pbp2x localizes separately from Pbp2b and other peptidoglycan synthesis  
470 proteins during later stages of cell division of *Streptococcus pneumoniae* D39. *Mol Microbiol*  
471 94(1):21-40.
- 472 13. Land AD, *et al.* (2013) Requirement of essential Pbp2x and GpsB for septal ring closure in  
473 *Streptococcus pneumoniae* D39. *Mol Microbiol* 90(5):939-955.
- 474 14. Perez-Nunez D, *et al.* (2011) A new morphogenesis pathway in bacteria: unbalanced activity  
475 of cell wall synthesis machineries leads to coccus-to-rod transition and filamentation in  
476 ovococci. *Mol Microbiol* 79(3):759-771.
- 477 15. Wheeler R, Mesnage S, Boneca IG, Hobbs JK, & Foster SJ (2011) Super-resolution microscopy  
478 reveals cell wall dynamics and peptidoglycan architecture in ovococcal bacteria. *Mol Microbiol*  
479 82(5):1096-1109.
- 480 16. Garner EC, *et al.* (2011) Coupled, circumferential motions of the cell wall synthesis machinery  
481 and MreB filaments in *B. subtilis*. *Science* 333(6039):222-225.
- 482 17. Mura A, *et al.* (2016) Roles of the essential protein FtsA in cell growth and division in  
483 *Streptococcus pneumoniae*. *J Bacteriol*.
- 484 18. Jacq M, *et al.* (2015) Remodeling of the Z-Ring Nanostructure during the *Streptococcus*  
485 *pneumoniae* Cell Cycle Revealed by Photoactivated Localization Microscopy. *MBio* 6(4).

- 486 19. Straume D, Stamsås GA, Berg KH, Salehian Z, & Håvarstein LS (2017) Identification of  
487 pneumococcal proteins that are functionally linked to penicillin-binding protein 2b (PBP2b).  
488 *Mol Microbiol* 103(1):99-116.
- 489 20. Fleurie A, *et al.* (2012) Mutational dissection of the S/T-kinase StkP reveals crucial roles in  
490 cell division of *Streptococcus pneumoniae*. *Mol Microbiol* 83(4):746-758.
- 491 21. Novakova L, *et al.* (2010) Identification of multiple substrates of the StkP Ser/Thr protein  
492 kinase in *Streptococcus pneumoniae*. *J Bacteriol* 192(14):3629-3638.
- 493 22. Beilharz K, *et al.* (2012) Control of cell division in *Streptococcus pneumoniae* by the conserved  
494 Ser/Thr protein kinase StkP. *Proc Natl Acad Sci U S A* 109(15):E905-913.
- 495 23. Zucchini L, *et al.* (2018) PASTA repeats of the protein kinase StkP interconnect cell  
496 constriction and separation of *Streptococcus pneumoniae*. *Nat Microbiol* 3(2):197-209.
- 497 24. Sun X, *et al.* (2010) Phosphoproteomic analysis reveals the multiple roles of phosphorylation  
498 in pathogenic bacterium *Streptococcus pneumoniae*. *J Proteome Res* 9(1):275-282.
- 499 25. Ulrych A, *et al.* (2016) Characterization of pneumococcal Ser/Thr protein phosphatase *phpP*  
500 mutant and identification of a novel PhpP substrate, putative RNA binding protein Jag. *BMC*  
501 *Microbiol* 16(1):247.
- 502 26. Stamsås GA, *et al.* (2017) Identification of EloR (Spr1851) as a regulator of cell elongation in  
503 *Streptococcus pneumoniae*. *Mol Microbiol* 105(6):954-967.
- 504 27. Grishin NV (1998) The R3H motif: a domain that binds single-stranded nucleic acids. *Trends*  
505 *Biochem Sci* 23(9):329-330.
- 506 28. Valverde R, Edwards L, & Regan L (2008) Structure and function of KH domains. *FEBS J*  
507 275(11):2712-2726.
- 508 29. Zheng JJ, Perez AJ, Tsui HT, Massidda O, & Winkler ME (2017) Absence of the KhpA and  
509 KhpB (JAG/EloR) RNA-binding proteins suppresses the requirement for PBP2b by  
510 overproduction of FtsA in *Streptococcus pneumoniae* D39. *Mol Microbiol* 106(5):793-814.

- 511 30. Karimova G, Pidoux J, Ullmann A, & Ladant D (1998) A bacterial two-hybrid system based  
512 on a reconstituted signal transduction pathway. *Proceedings of the National Academy of*  
513 *Sciences* 95(10):5752-5756.
- 514 31. Nicastro G, Taylor IA, & Ramos A (2015) KH-RNA interactions: back in the groove. *Curr*  
515 *Opin Struct Biol* 30:63-70.
- 516 32. Hollingworth D, *et al.* (2012) KH domains with impaired nucleic acid binding as a tool for  
517 functional analysis. *Nucleic acids research* 40(14):6873-6886.
- 518 33. Tan K, Keigher L, Jedrzejczak R, Babnigg G, & Joachimiak A (The crystal structure of a  
519 probable RNA-binding protein from *Clostridium symbiosum* ATCC 14940).  
520 (<http://www.rcsb.org/structure/3GKU>).
- 521 34. Bisson-Filho AW, *et al.* (2017) Treadmilling by FtsZ filaments drives peptidoglycan synthesis  
522 and bacterial cell division. *Science* 355(6326):739-743.
- 523 35. Yang X, *et al.* (2017) GTPase activity-coupled treadmilling of the bacterial tubulin FtsZ  
524 organizes septal cell wall synthesis. *Science* 355(6326):744-747.
- 525 36. Slager J, Aprianto R, & Veening JW (2018) Deep genome annotation of the opportunistic  
526 human pathogen *Streptococcus pneumoniae* D39. *Nucleic Acids Res*  
527 <https://doi.org/10.1093/nar/gky725>.
- 528 37. Wu ZC, de Keyzer J, Berrelkamp-Lahpor GA, & Driessen AJ (2013) Interaction of  
529 *Streptococcus mutans* YidC1 and YidC2 with translating and nontranslating ribosomes. *J*  
530 *Bacteriol* 195(19):4545-4551.
- 531 38. Steinberg R, Knupffer L, Origi A, Asti R, & Koch HG (2018) Co-translational protein targeting  
532 in bacteria. *FEMS Microbiol Lett* 365(11).
- 533 39. Lacks S & Hotchkiss RD (1960) A study of the genetic material determining an enzyme activity  
534 in pneumococcus. *Biochimica et biophysica acta* 39(3):508-518.
- 535 40. Higuchi R, Krummel B, & Saiki R (1988) A general method of in vitro preparation and specific  
536 mutagenesis of DNA fragments: study of protein and DNA interactions. *Nucleic acids research*  
537 16(15):7351-7367.

- 538 41. Sung C, Li H, Claverys J, & Morrison D (2001) An *rpsL* cassette, janus, for gene replacement  
539 through negative selection in *Streptococcus pneumoniae*. *Applied and environmental*  
540 *microbiology* 67(11):5190-5196.
- 541 42. van Raaphorst R, Kjos M, & Veening JW (2017) Chromosome segregation drives division site  
542 selection in *Streptococcus pneumoniae*. *Proc Natl Acad Sci U S A* 114(29):E5959-E5968.
- 543 43. Laemmli UK (1970) Cleavage of structural proteins during the assembly of the head of  
544 bacteriophage T4. *nature* 227(5259):680.
- 545 44. Stamsås GA, Straume D, Salehian Z, & Håvarstein LS (2017) Evidence that pneumococcal  
546 WalK is regulated by StkP through protein–protein interaction. *Microbiology* 163(3):383-399.
- 547 45. Steinmoen H, Knutsen E, & Håvarstein LS (2002) Induction of natural competence in  
548 *Streptococcus pneumoniae* triggers lysis and DNA release from a subfraction of the cell  
549 population. *Proceedings of the National Academy of Sciences* 99(11):7681-7686.
- 550 46. Ducret A, Quardokus EM, & Brun YV (2016) MicrobeJ, a tool for high throughput bacterial  
551 cell detection and quantitative analysis. *Nature microbiology* 1(7):16077.
- 552 47. Roy A, Kucukural A, & Zhang Y (2010) I-TASSER: a unified platform for automated protein  
553 structure and function prediction. *Nature protocols* 5(4):725.
- 554 48. Pierce BG, *et al.* (2014) ZDOCK server: interactive docking prediction of protein–protein  
555 complexes and symmetric multimers. *Bioinformatics* 30(12):1771-1773.
- 556 49. Johnsborg O & Håvarstein LS (2009) Pneumococcal LytR, a protein from the LytR-CpsA-Psr  
557 family, is essential for normal septum formation in *Streptococcus pneumoniae*. *J Bacteriol*  
558 191(18):5859-5864.

559

560



561 **Tables.**

562 Table 1. *S. pneumoniae* strains used in the present study.

| <b>Name</b> | <b>Relevant characteristics</b>                                                                                    | <b>Reference</b> |
|-------------|--------------------------------------------------------------------------------------------------------------------|------------------|
| R704        | R6 derivative, <i>comA::ermAM</i> ; Ery <sup>R</sup>                                                               | JP. Claverys*    |
| RH425       | R704, but streptomycin resistant; Ery <sup>R</sup> , Sm <sup>R</sup>                                               | (49)             |
| DS420       | $\Delta comA$ , $\Delta khpA$ ; Ery <sup>R</sup> , Sm <sup>R</sup>                                                 | This work        |
| DS428       | $\Delta comA$ , $\Delta khpA$ , $\Delta pbp2b::janus$ ; Ery <sup>R</sup> , Kan <sup>R</sup>                        | This work        |
| AW5         | $\Delta comA$ , <i>khpA-sfgfp</i> ; Ery <sup>R</sup> , Sm <sup>R</sup>                                             | This work        |
| AW24        | $\Delta comA$ , <i>khpA<sup>GDDG</sup></i> ; Ery <sup>R</sup> , Sm <sup>R</sup>                                    | This work        |
| AW27        | $\Delta comA$ , <i>khpA<sup>GDDG</sup></i> , $\Delta pbp2b::janus$ ; Ery <sup>R</sup> , Kan <sup>R</sup>           | This work        |
| AW198       | $\Delta comA$ , <i>khpA-sfgfp</i> , <i>ftsZ-mKate2-Km</i> ; Ery <sup>R</sup> , Km <sup>R</sup> , Sm <sup>R</sup>   | This work        |
| AW212       | $\Delta comA$ , <i>khpA<sup>I61F</sup></i> ; Ery <sup>R</sup> , Sm <sup>R</sup>                                    | This work        |
| AW238       | $\Delta comA$ , <i>khpA-sfgfp</i> , $\Delta eloR$ ; Ery <sup>R</sup> , Sm <sup>R</sup>                             | This work        |
| AW267       | $\Delta comA$ , <i>khpA<sup>I61F</sup>-sfgfp</i> ; Ery <sup>R</sup> , Sm <sup>R</sup>                              | This work        |
| AW275       | $\Delta comA$ , <i>khpA<sup>I61Y</sup></i> ; Ery <sup>R</sup> , Sm <sup>R</sup>                                    | This work        |
| AW279       | $\Delta comA$ , <i>eloR<sup>L239Y</sup></i> ; Ery <sup>R</sup> , Sm <sup>R</sup>                                   | This work        |
| AW313       | $\Delta comA$ , <i>khpA<sup>I61Y</sup></i> , $\Delta pbp2b::janus$ ; Ery <sup>R</sup> , Kan <sup>R</sup>           | This work        |
| AW314       | $\Delta comA$ , <i>eloR<sup>L239Y</sup></i> , $\Delta pbp2b::janus$ ; Ery <sup>R</sup> , Kan <sup>R</sup>          | This work        |
| AW321       | $\Delta comA$ , <i>khpA<sup>I61Y</sup>-sfgfp</i> ; Ery <sup>R</sup> , Sm <sup>R</sup>                              | This work        |
| AW334       | $\Delta comA$ , <i>flag-eloR<sup>L239C</sup></i> ; Ery <sup>R</sup> , Sm <sup>R</sup>                              | This work        |
| AW336       | $\Delta comA$ , <i>flag-eloR<sup>L239C</sup></i> , <i>khpA<sup>I61C</sup></i> ; Ery <sup>R</sup> , Sm <sup>R</sup> | This work        |
| AW353       | $\Delta comA$ , <i>khpA-sfgfp</i> , <i>eloR<sup>L239Y</sup></i> ; Ery <sup>R</sup> , Sm <sup>R</sup>               | This work        |
| SPH446      | $\Delta comA$ , $\Delta eloR$ , $\Delta pbp2b::janus$ ; Ery <sup>R</sup> , Kan <sup>R</sup>                        | (26)             |
| SPH448      | $\Delta comA$ , <i>flag-eloR</i> ; Ery <sup>R</sup> , Sm <sup>R</sup>                                              | (26)             |
| RR66        | D39 derivative, <i>ftsZ-mKate2</i> , Kan <sup>R</sup>                                                              | (42)             |

563 \*Gift from Professor Jean-Pierre Claverys, CNRS, Toulouse, France.

## 564 **Figure legends**

565 **Fig. 1.** BACTH-assay showing that KhpA interacts directly with EloR and with itself. KhpA  
566 was probed against full-length EloR, the R3H domain, the KH-II<sup>EloR</sup> domain, the Jag domain  
567 and EloR missing the C-terminal R3H domain (EloR<sup>ΔR3H</sup>). Positive interactions (blue spots)  
568 were only seen between KhpA and parts of EloR having the KH-II<sup>EloR</sup> domain. The positive  
569 self-interaction of KhpA is shown at the bottom.

570

571 **Fig. 2.** Structure prediction of KhpA using iTasser and ZDOCK. A. KhpA was predicted to  
572 have the typical  $\alpha$ - $\beta$ - $\beta$ - $\alpha$ - $\alpha$ - $\beta$  fold of KH-II domains, with the I61 (shown in magenta)  
573 protruding from the  $\alpha$ 3-helix. The structures of the I61F and I61Y substitutions are shown. B.  
574 Protein-protein docking of KhpA homodimers using ZDOCK. The  $\alpha$ 3-helix of two KhpA  
575 molecules are predicted to make contact anti-parallel of each other forming a homodimer where  
576 the GXXG RNA-binding loops (shown in green) point in opposite directions. The I61  
577 (magenta) of two KhpA monomers are brought in close proximity in the dimeric structure,  
578 facilitating a hydrophobic contact surface. C. BACTH assay showing KhpA's ability to form  
579 homodimers when selected amino acids in the  $\alpha$ 3-helix were changed (R53K, R59K, T60Q  
580 and I61F). Positive interactions appear as blue spots.

581

582 **Fig. 3.** The  $\alpha$ 3-helix of KhpA is critical for self-dimerization and for EloR/KhpA complex  
583 formation. A. Quantitative measurements of  $\beta$ -galactosidase production in BACTH assays  
584 testing the interaction between EloR and KhpA, KhpA<sup>I61F</sup> or KhpA<sup>I61Y</sup> in addition to EloR<sup>L239Y</sup>  
585 against KhpA (green bars).  $\beta$ -galactosidase production resulting from homodimerization of  
586 KhpA, KhpA<sup>I61F</sup> and KhpA<sup>I61Y</sup> is represented by orange bars, while negative and positive

587 controls are shown in grey. B. Immunoblot detection of 3xflag-EloR in strain RH425, SPH448,  
588 AW334 and AW336. A crosslinked EloR/KhpA complex was observed in strain AW336 under  
589 non-reducing conditions (-), but not after reduction with  $\beta$ -mercaptoethanol (+).

590

591 **Fig. 4.** A. Comparison of the morphology of strain RH425 (wt), DS420 ( $\Delta khpA$ ), AW212  
592 (I61F) and AW275 (I61Y). Loss of KhpA homodimerization (KhpA<sup>I61F</sup>) produced cells with  
593 morphology similar to wild type. Cells in which KhpA no longer interacts with EloR  
594 (KhpA<sup>I61Y</sup>) had morphologies resembling the  $\Delta khpA$  mutant. Scale bars are 2  $\mu$ m. B.  
595 Comparison of the cell-shape distribution (length/width) of  $\Delta khpA$ -, KhpA<sup>I61F</sup>- and KhpA<sup>I61Y</sup>-  
596 cells (in green) with wild type cells (in grey). KhpA<sup>I61Y</sup> and  $\Delta khpA$  cells were both significantly  
597 different from wild type ( $p < 0.05$ , two-sample t-test), while the shape distribution of KhpA<sup>I61F</sup>  
598 cells was similar to wild type. C. Quantitative BACTH assay showing that KhpA<sup>GDDG</sup> self-  
599 dimerizes and forms complex with EloR.

600

601 **Fig. 5.** Micrographs showing the localization of KhpA-sfGFP in strain AW5 (wt), AW238  
602 ( $\Delta eloR$ ), AW267 (KhpA<sup>I61F</sup>-sfGFP), AW321 (KhpA<sup>I61Y</sup>-sfGFP) and AW353 (EloR<sup>L239Y</sup>). The  
603 percent of cells having KhpA-sfGFP localized to mid-cell are indicated. Scale bars are 2  $\mu$ m.

604

605 **Fig. 6.** Localization of KhpA-sfGFP and mKate2-FtsZ at different stages of cell division. A.  
606 Microscopic examination of strain AW198 showed that KhpA-sfGFP co-localizes to the  
607 division site with FtsZ-mKate2 during cell division. Scale bars are 2  $\mu$ m. B. The fluorescence  
608 maximum signals of FtsZ-mKate2 and KhpA-sfGFP plotted relative to cell length. 437 cells  
609 were analyzed.

610 **Figures**

611 Fig. 1

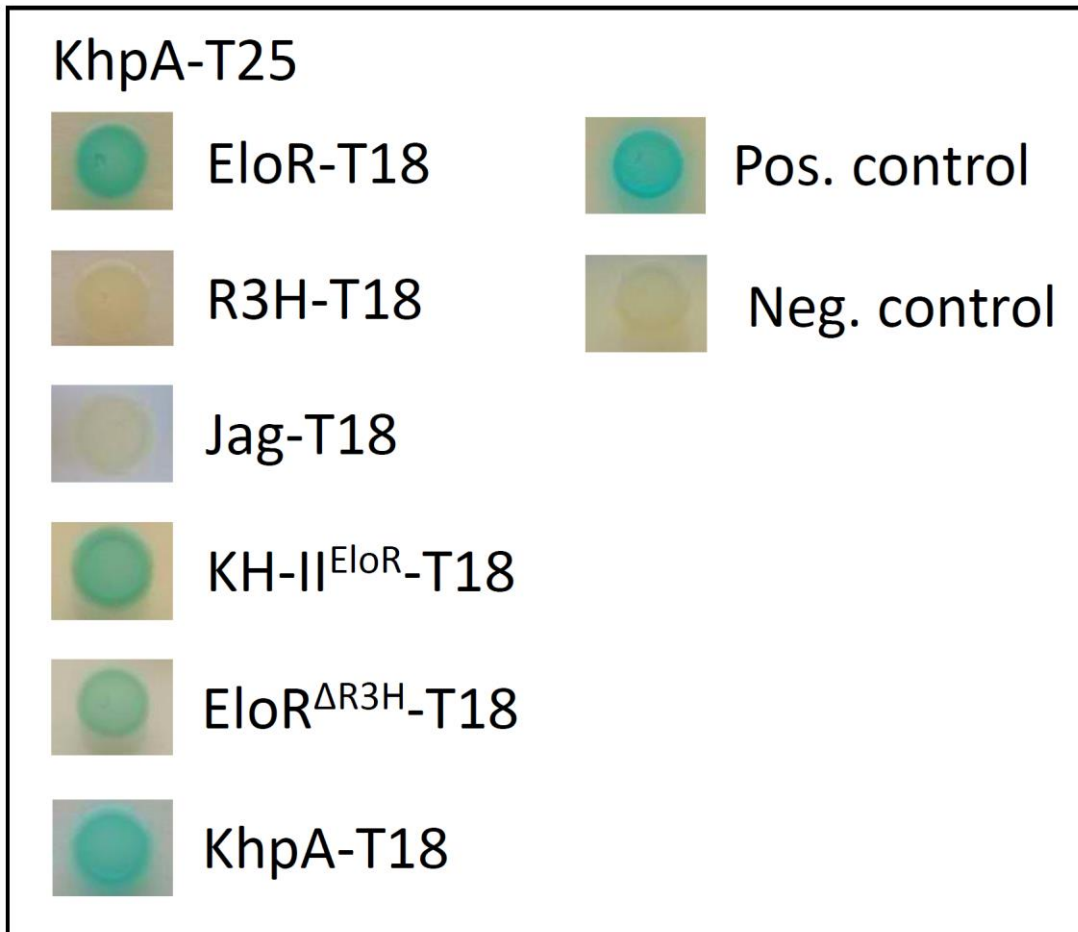

612

613

614 Fig. 2

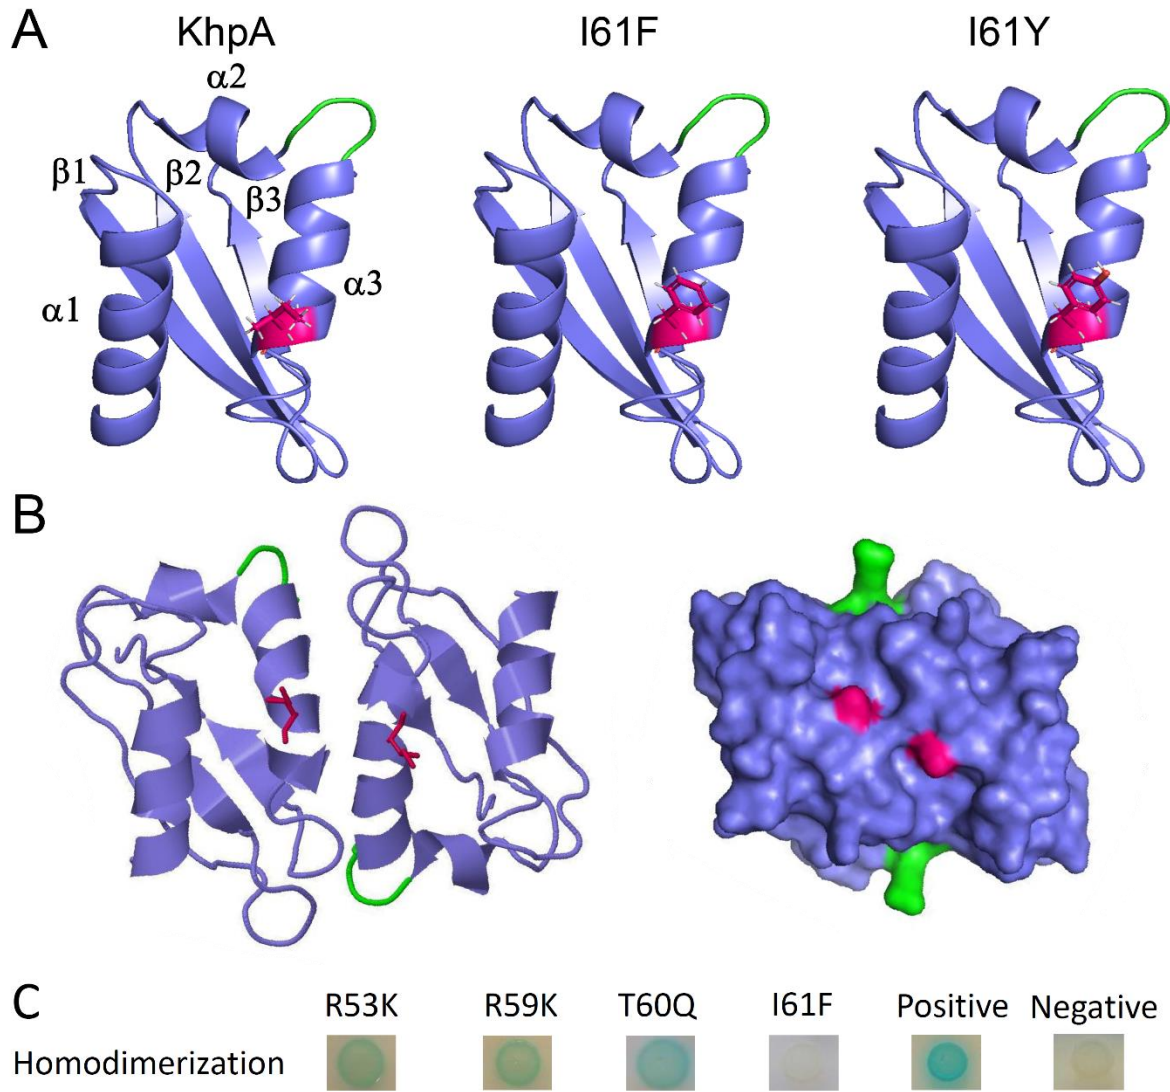

615

616

617 Fig. 3

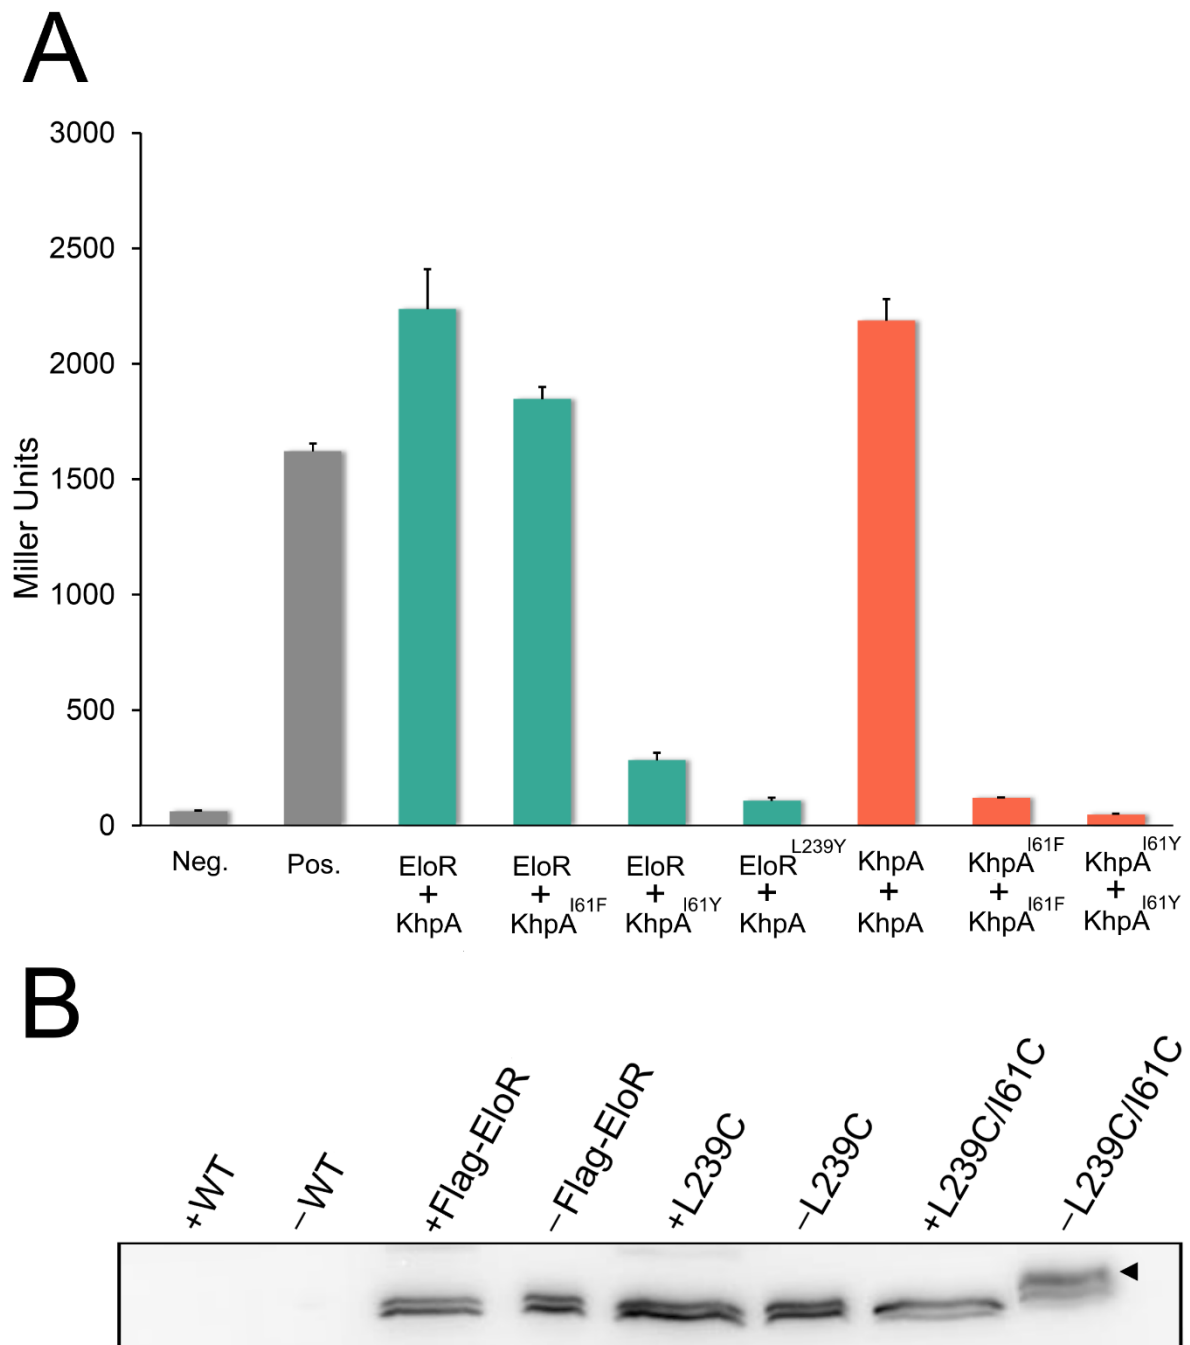

618

619

620 Fig. 4

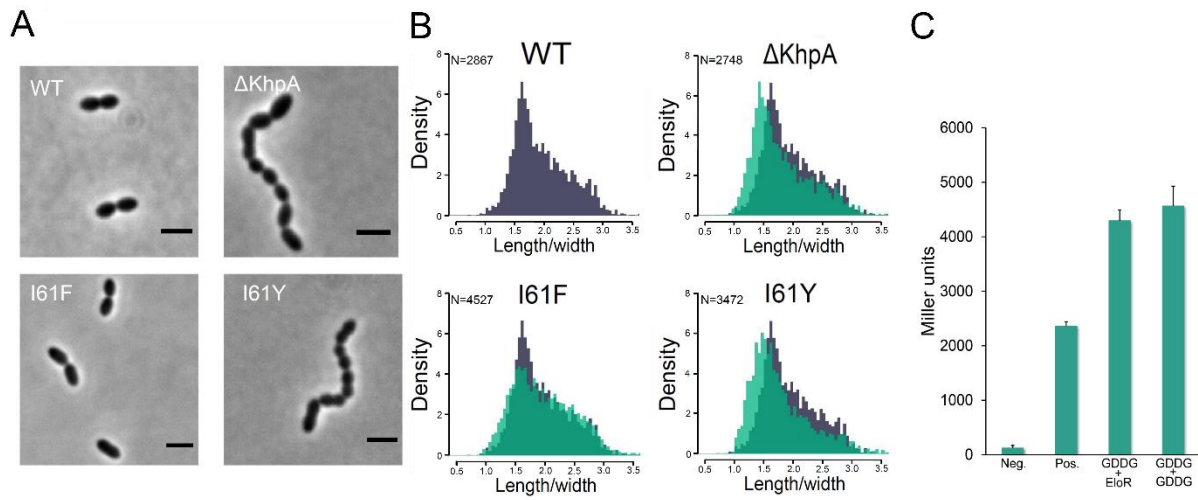

621

622

623 Fig. 5

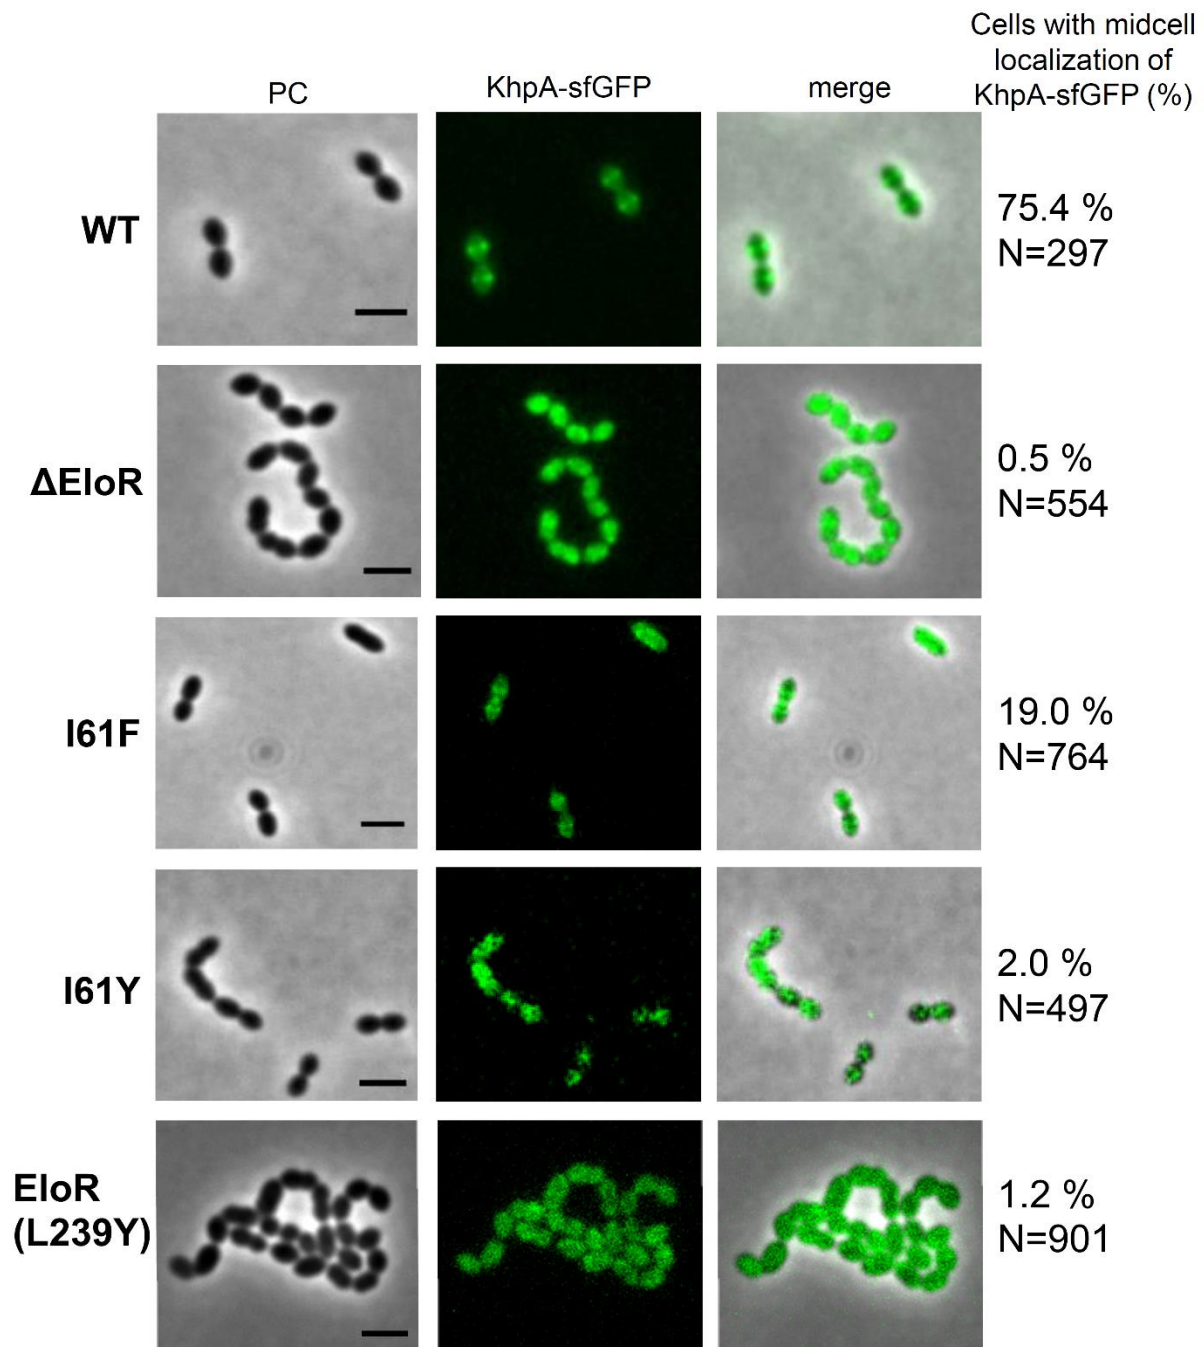

624

625



626 Fig. 6

**A**

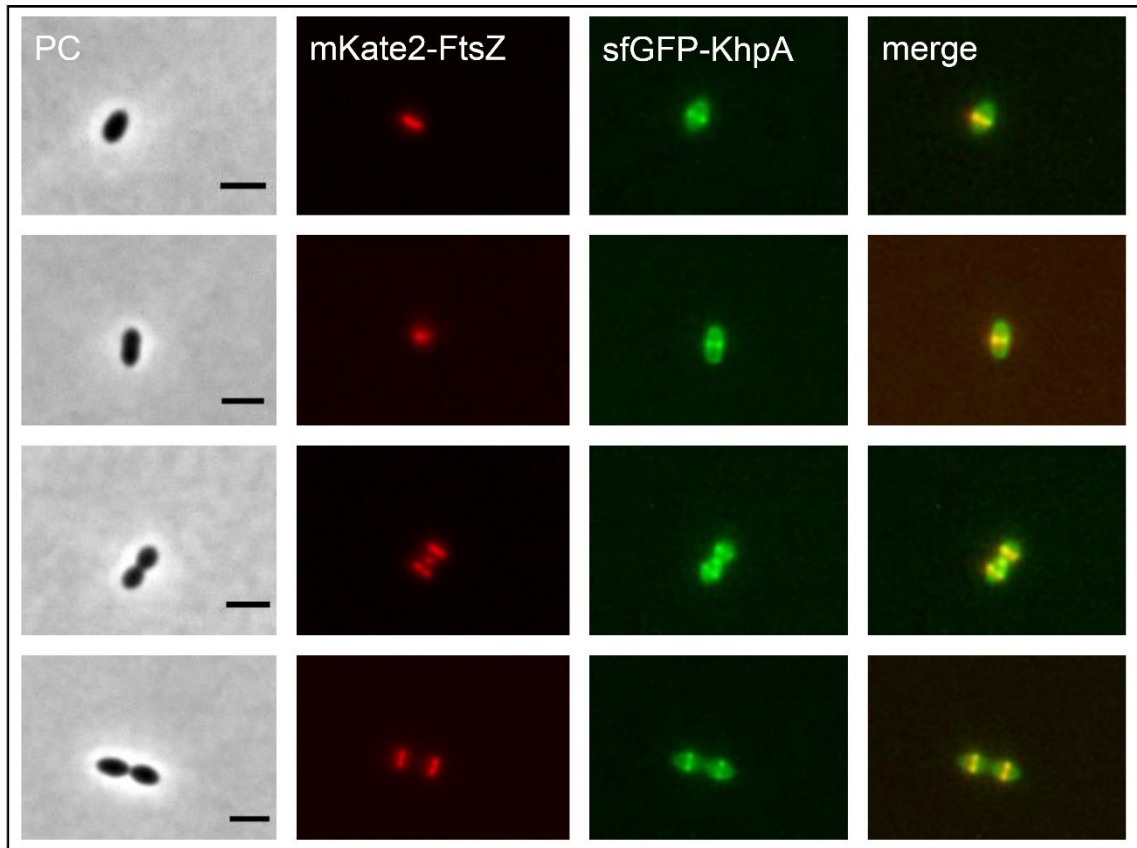

**B**

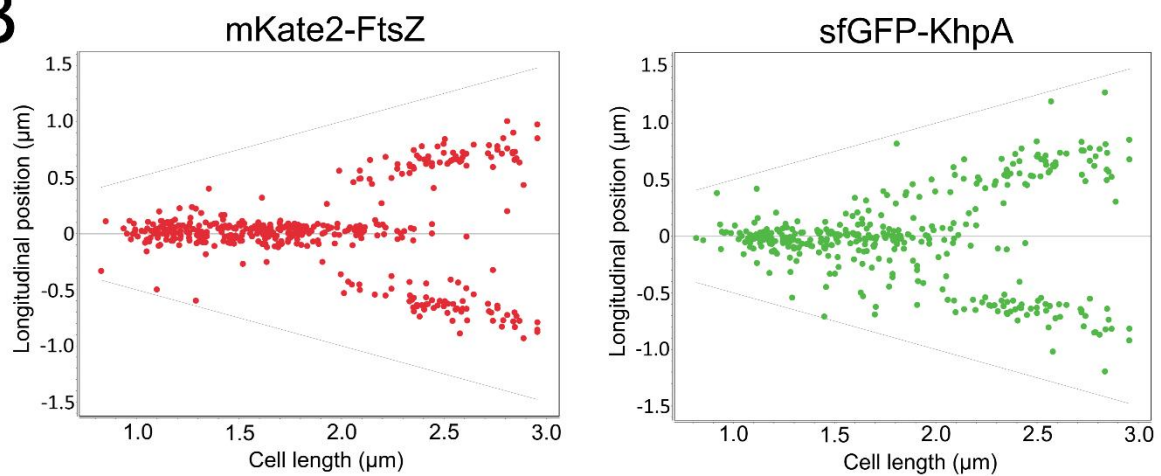

627
